# Supplementary material for: Intravascular emboli relates to immunosuppressive tumor microenvironment and predicts prognosis in stage III colorectal cancer
Source: publisher site journal article supplement (doi:10.18632/aging.203451), 2021-08-26
Supplement: Supplementary file [file aging-v13i16-203451-supplementary-material-SD1.pdf]

## SUPPLEMENTARY FIGURE

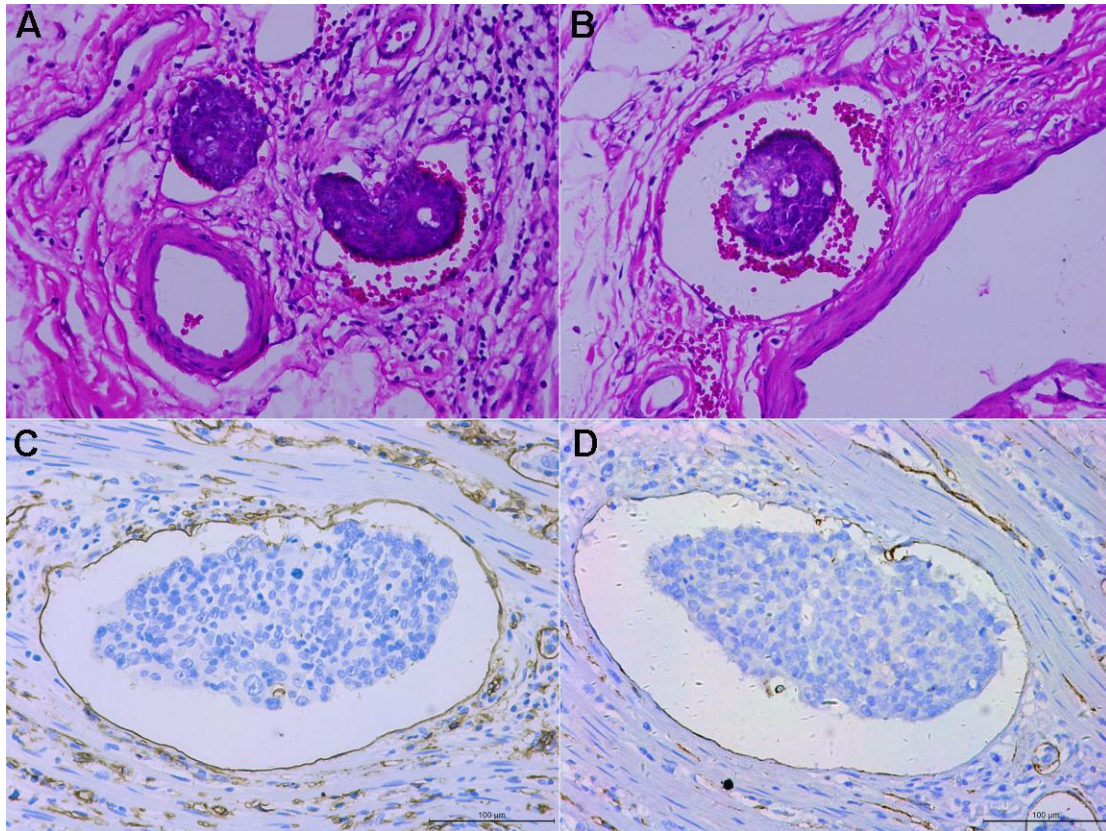

**Supplementary Figure 1. Intravascular emboli (IVE) diagnostic criteria by HE and IHC staining.** (A, B) IVE diagnosed by HE staining: a cluster of tumor cells in an endothelium-lined space either surrounded by a rim of smooth muscle or containing red blood cells; (C, D) IVE diagnosed by IHC staining: blood vessel endothelium strongly stained by CD34 antibody but not stained by D2-40.
