# Supplementary material for: Intravascular emboli relates to immunosuppressive tumor microenvironment and predicts prognosis in stage III colorectal cancer
Source: publisher site journal article supplement (doi:10.18632/aging.203451), 2021-08-26
Supplement: Supplementary file [file aging-v13i16-203451-supplementary-material-SD2.pdf]

## SUPPLEMENTARY TABLES

**Supplementary Table 1. Baseline demographic and clinical characteristics of patients.**

| Parameters                             | N   | Range  | Minimum | Maximum | Mean    |
|----------------------------------------|-----|--------|---------|---------|---------|
| Age (year)                             | 220 | 69.00  | 14.00   | 83.00   | 55.710  |
| Total protein (g/dL)                   | 220 | 35.50  | 48.10   | 83.60   | 66.689  |
| Albumin (g/dL)                         | 220 | 48.30  | 4.10    | 52.40   | 39.883  |
| Globulin (g/dL)                        | 219 | 26.40  | 15.30   | 41.70   | 26.646  |
| A/G ration                             | 220 | 1.40   | 0.90    | 2.30    | 1.539   |
| Total bilirubin ( $\mu\text{mol/L}$ )  | 220 | 59.60  | 0.20    | 59.80   | 10.855  |
| Direct bilirubin ( $\mu\text{mol/L}$ ) | 220 | 28.10  | 0.90    | 29.00   | 4.163   |
| ALT (U/L)                              | 220 | 149.10 | 3.20    | 152.30  | 19.925  |
| AST (U/L)                              | 220 | 104.30 | 9.90    | 114.20  | 22.488  |
| Urea (mmol/L)                          | 220 | 13.50  | 1.16    | 14.66   | 4.677   |
| Creatinine ( $\mu\text{mol/L}$ )       | 220 | 131.80 | 23.60   | 155.40  | 79.018  |
| Glucose (mmol/L)                       | 209 | 11.76  | 2.34    | 14.10   | 5.263   |
| Triglyceride (mmol/L)                  | 184 | 9.36   | 0.37    | 9.73    | 1.306   |
| Cholesterol (mmol/L)                   | 184 | 7.28   | 1.47    | 8.75    | 4.540   |
| HDL (mmol/L)                           | 184 | 2.12   | 0.22    | 2.34    | 1.266   |
| LDL (mmol/L)                           | 184 | 22.60  | 0.00    | 22.60   | 2.884   |
| HDL/CHO                                | 184 | 2.11   | 0.15    | 2.26    | 0.295   |
| Potassium (mmol/L)                     | 220 | 2.60   | 2.42    | 5.02    | 3.985   |
| Sodium (mmol/L)                        | 220 | 27.60  | 121.10  | 148.70  | 141.606 |
| Chloride (mmol/L)                      | 220 | 14.70  | 95.40   | 110.10  | 103.829 |
| Calcium (mmol/L)                       | 220 | 0.88   | 1.69    | 2.57    | 2.254   |
| WBC count ( $10^3/\text{mL}$ )         | 220 | 13.20  | 2.40    | 15.60   | 6.228   |
| RBC count ( $10^6/\text{mL}$ )         | 220 | 3.10   | 2.61    | 5.71    | 4.083   |
| Hemoglobin (g/L)                       | 220 | 149.00 | 16.00   | 165.00  | 117.370 |
| Platelet count ( $10^3/\text{mL}$ )    | 220 | 681.00 | 21.00   | 702.00  | 230.250 |
| Neutrophil count ( $10^3/\text{mL}$ )  | 220 | 12.60  | 0.90    | 13.50   | 3.961   |
| Lymphocyte count ( $10^3/\text{mL}$ )  | 220 | 3.80   | 0.10    | 3.90    | 1.573   |
| Monocyte count ( $10^3/\text{mL}$ )    | 220 | 1.30   | 0.10    | 1.40    | 0.486   |
| Neutrophil percentage (%)              | 220 | 69.00  | 28.00   | 97.00   | 61.733  |
| Lymphocyte percentage (%)              | 220 | 56.00  | 1.00    | 57.00   | 26.495  |
| Monocyte percentage (%)                | 220 | 17.20  | 0.70    | 17.90   | 8.070   |
| Thrombocytocrit (%)                    | 220 | 0.50   | 0.00    | 0.50    | 0.202   |
| MPV (fl)                               | 220 | 9.70   | 6.20    | 15.90   | 8.822   |
| PDW (%)                                | 220 | 15.50  | 7.00    | 22.50   | 16.799  |
| PT (second)                            | 220 | 13.90  | 10.20   | 24.10   | 12.729  |
| INR                                    | 220 | 1.15   | 0.79    | 1.94    | 0.982   |
| APTT (second)                          | 220 | 28.20  | 23.20   | 51.40   | 34.376  |
| TT (second)                            | 220 | 63.60  | 13.90   | 77.50   | 17.726  |
| Fibrinogen (g/L)                       | 219 | 6.27   | 1.61    | 7.88    | 3.663   |

Abbreviations: A/G, albumin to globulin ration; ALT, Alanine aminotransferase; AST, Aspartate aminotransferase; HDL, high-density lipoprotein; LDL, low-density lipoprotein; HDL/CHO, high-density lipoprotein to cholesterol ration; WBC, white blood cell; RBC, red blood cell; MPV, mean platelet volume; PDW, platelet distribution width; PT, prothrombin time; INR, international normalized ratio; APTT, activated partial thromboplastin time; TT, thrombin time.

**Supplementary Table 2. Relationships between clinical characteristics and IVE.**

| <b>Parameters</b>     | <b>non-IVE group</b> | <b>IVE group</b> | <b>P-value</b>   |
|-----------------------|----------------------|------------------|------------------|
| Age                   |                      |                  |                  |
| ≤60                   | 55                   | 77               | 0.697            |
| >60                   | 39                   | 49               |                  |
| Gender                |                      |                  |                  |
| Male                  | 47                   | 79               | 0.060            |
| Female                | 47                   | 47               |                  |
| Location              |                      |                  |                  |
| Left colon            | 18                   | 23               | 0.241            |
| Right colon           | 23                   | 20               |                  |
| Rectum                | 53                   | 83               |                  |
| Invasion depth        |                      |                  |                  |
| T1-2                  | 14                   | 9                | 0.063            |
| T3-4                  | 80                   | 117              |                  |
| Lymph node metastasis |                      |                  |                  |
| pN1                   | 65                   | 55               | <b>&lt;0.001</b> |
| pN2                   | 29                   | 71               |                  |
| Histologic type       |                      |                  |                  |
| Mucinous/mix          | 14                   | 15               | <b>&lt;0.001</b> |
| Poor                  | 6                    | 43               |                  |
| Well /Moderate        | 74                   | 68               |                  |
| Tumor Morphology      |                      |                  |                  |
| Ulcerative            | 44                   | 57               | 0.472            |
| Infiltrating          | 3                    | 8                |                  |
| Protruded             | 46                   | 53               |                  |
| Diameter              |                      |                  |                  |
| <5cm                  | 45                   | 73               | 0.070            |
| ≥5cm                  | 48                   | 47               |                  |
| Obstruction symptoms  |                      |                  |                  |
| No                    | 93                   | 113              | <b>0.008</b>     |
| Yes                   | 1                    | 12               |                  |
| CEA (ng/ml)           |                      |                  |                  |
| <5                    | 64                   | 83               | 0.095            |
| ≥5                    | 28                   | 37               |                  |
| CA199 (kU/L)          |                      |                  |                  |
| <35                   | 77                   | 96               | 0.491            |
| ≥35                   | 15                   | 24               |                  |
| CA242 (kU/L)          |                      |                  |                  |
| <20                   | 73                   | 95               | 0.806            |
| ≥20                   | 16                   | 19               |                  |
| Adjuvant chemotherapy |                      |                  |                  |
| FOLFOX4/6             | 58                   | 78               | 0.737            |
| XELOX                 | 7                    | 10               |                  |
| Other                 | 2                    | 6                |                  |
| No chemotherapy       | 27                   | 32               |                  |

**Supplementary Table 3. Difference of blood routine and chemistry between groups.**

| Parameters                             | non-IVE group | IVE group    | P-value      |
|----------------------------------------|---------------|--------------|--------------|
| Total protein (g/dL)                   | 66.38±6.12    | 66.92±6.51   | 0.539        |
| Albumin (g/dL)                         | 39.92±4.39    | 39.86±5.34   | 0.929        |
| Globulin (g/dL)                        | 26.47±4.26    | 26.78±4.45   | 0.600        |
| A/G ration                             | 1.54±0.27     | 1.53±0.29    | 0.783        |
| Total bilirubin (μmol/L)               | 10.98±7.40    | 10.76±6.01   | 0.812        |
| Direct bilirubin (μmol/L)              | 4.11±3.31     | 4.20±2.47    | 0.822        |
| ALT (U/L)                              | 21.2±15.82    | 19.1±17.07   | 0.396        |
| AST (U/L)                              | 22.51±9.51    | 22.47±13.66  | 0.980        |
| Urea (mmol/L)                          | 4.58±1.62     | 4.75±1.81    | 0.474        |
| Creatinine (μmol/L)                    | 74.7±19.2     | 82.24±20.34  | <b>0.006</b> |
| Glucose (mmol/L)                       | 5.17±1.08     | 5.34±1.34    | 0.330        |
| Triglyceride (mmol/L)                  | 1.29±1.08     | 1.32±1.17    | 0.828        |
| Cholesterol (mmol/L)                   | 4.53±1.02     | 4.54±0.99    | 0.940        |
| HDL (mmol/L)                           | 1.24±0.26     | 1.29±0.32    | 0.249        |
| LDL (mmol/L)                           | 2.77±0.96     | 2.97±2.12    | 0.424        |
| HDL/CHO                                | 0.28±0.07     | 0.31±0.20    | 0.309        |
| Potassium (mmol/L)                     | 3.94±0.43     | 4.02±0.38    | 0.156        |
| Sodium (mmol/L)                        | 141.58±3.48   | 141.63±2.73  | 0.909        |
| Chloride (mmol/L)                      | 104.29±2.82   | 103.49±3.10  | 0.050        |
| Calcium (mmol/L)                       | 2.25±0.13     | 2.25±0.12    | 0.968        |
| WBC count (10 <sup>3</sup> /mL)        | 6.01±2.05     | 6.39±2.29    | 0.213        |
| RBC count (10 <sup>6</sup> /mL)        | 4.04±0.58     | 4.11±0.58    | 0.344        |
| Hemoglobin (g/L)                       | 116.12±23.26  | 118.31±24.56 | 0.504        |
| Platelet count (10 <sup>3</sup> /mL)   | 225.67±94.72  | 233.67±95.28 | 0.537        |
| Neutrophil count (10 <sup>3</sup> /mL) | 3.68±1.82     | 4.17±2.04    | 0.066        |
| Lymphocyte count (10 <sup>3</sup> /mL) | 1.66±0.59     | 1.51±0.65    | 0.093        |
| Monocyte count (10 <sup>3</sup> /mL)   | 0.48±0.18     | 0.49±0.20    | 0.665        |
| Neutrophil percentage (%)              | 59.26±10.38   | 63.38±10.17  | <b>0.002</b> |
| Lymphocyte percentage (%)              | 28.77±9.62    | 24.80±9.19   | <b>0.002</b> |
| Monocyte percentage (%)                | 8.23±2.81     | 7.95±2.82    | 0.480        |
| Thrombocytocrit (%)                    | 0.20±0.08     | 0.20±0.08    | 0.590        |
| MPV (fl)                               | 8.95±1.69     | 8.73±1.33    | 0.268        |
| PDW (%)                                | 16.77±1.43    | 16.82±0.75   | 0.727        |
| PT (second)                            | 12.71±0.88    | 12.74±1.40   | 0.839        |
| INR                                    | 0.98±0.08     | 0.99±0.12    | 0.520        |
| APTT (second)                          | 34.58±4.56    | 34.22±5.02   | 0.583        |
| TT (second)                            | 17.19±1.41    | 18.1±5.61    | 0.116        |
| Fibrinogen (g/L)                       | 3.74±1.06     | 3.60±0.80    | 0.289        |

Abbreviations: A/G, albumin to globulin ration; ALT, Alanine aminotransferase; AST, Aspartate aminotransferase; HDL, high-density lipoprotein; LDL, low-density lipoprotein; HDL/CHO, high-density lipoprotein to cholesterol ration; WBC, white blood cell; RBC, red blood cell; MPV, mean platelet volume; PDW, platelet distribution width; PT, prothrombin time; INR, international normalized ratio; APTT, activated partial thromboplastin time; TT, thrombin time.

**Supplementary Table 4. Six patients for microarray analysis.**

| <b>Patients</b> | <b>IVE</b> | <b>Age</b> | <b>Gender</b> | <b>TNM stage</b> | <b>LY%</b> | <b>NE%</b> | <b>Location</b> | <b>Lymph node metastasis</b> | <b>Histologic type</b> |
|-----------------|------------|------------|---------------|------------------|------------|------------|-----------------|------------------------------|------------------------|
| NO.1            | YES        | 61         | Male          | T4aN1bM0         | 27.5       | 33.0       | Rectum          | 2/13                         | Moderate               |
| NO.2            | YES        | 60         | Male          | T4aN1bM0         | 24.0       | 66.7       | Sigmoid         | 3/11                         | Moderate               |
| NO.3            | YES        | 62         | Male          | T4aN2bM0         | 16.8       | 77.9       | Rectum          | 7/12                         | Moderate               |
| NO.4            | NO         | 52         | Female        | T4aN1bM0         | 32.0       | 57.0       | Rectum          | 3/18                         | Moderate               |
| NO.5            | NO         | 43         | Male          | T4aN2aM0         | 37.2       | 57.3       | Rectum          | 6/11                         | Moderate               |
| NO.6            | NO         | 63         | Male          | T4aN1aM0         | 41.0       | 42.7       | Rectum          | 2/14                         | Moderate               |

**Supplementary Table 5. Top ten up/down regulated genes in IVE group.**

| <b>Genes</b>   | <b>log2 (Fold change)</b> | <b>P-value</b> |
|----------------|---------------------------|----------------|
| CALB1          | 9.250                     | 0.001          |
| REG1A          | 5.930                     | 0.011          |
| DSG3           | 5.928                     | 0.001          |
| KLK8           | 5.866                     | 0.022          |
| ABHD12B        | 5.697                     | 0.034          |
| XLOC_004031    | 5.419                     | 0.026          |
| KLK12          | 3.993                     | 0.024          |
| MAGEA6         | 3.355                     | 0.031          |
| KRT16P2        | 3.105                     | 0.011          |
| PLA2G4D        | 3.104                     | 0.010          |
| XLOC_011804    | -2.677                    | 0.042          |
| RIIAD1         | -2.731                    | 0.007          |
| ASPN           | -2.748                    | 0.014          |
| XLOC_12_015529 | -2.801                    | 0.020          |
| DRD2           | -2.935                    | 0.010          |
| ZBTB16         | -2.943                    | 0.024          |
| XLOC_012248    | -2.945                    | 0.008          |
| XLOC_12_010573 | -3.307                    | 0.023          |
| PTF1A          | -3.526                    | 0.044          |
| DKK1           | -4.461                    | 0.023          |
